# Supplementary material
Source: publisher figshare collection journal article supplement (https://geolsoc.figshare.com/ndownloader/files/32591316)

## Supplemental material 3 – additional figures

**Supplemental material 3-2.** Correlation chart of pre-Devonian events of the terranes of Svalbard's Northwestern Province with the position of dated samples (this study). Data for Albert I Land are from Myhre *et al.* (2008) and Pettersson *et al.* (2009a, b). Note the different age scale at 500 Ma and younger. Dashed arrows upward demonstrate that the ages obtained are maximum deposition ages; the deposition of the sediments could also be younger. Dashed rectangle shows location of figure 15. BFG – Biscayarfonna Group, HP – High-pressure metamorphism, KFG – Krossfjorden Group, LG – Lernerøyane Group, LMC – Liefdefjorden Migmatite Complex, RC – Richarddalen Complex, SMC – Smeerenburgfjorden Migmatite Complex.

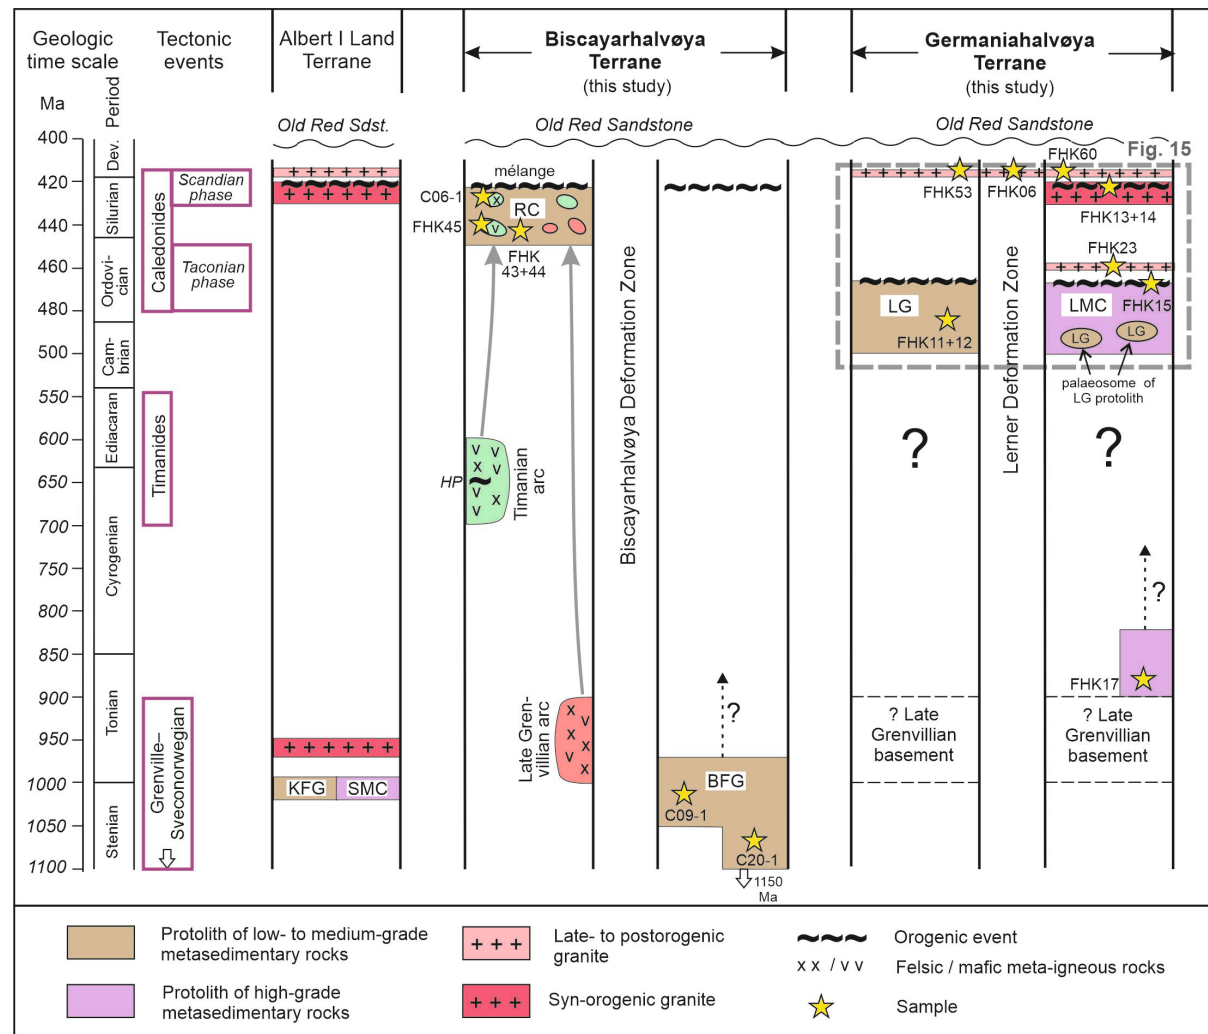

Supplement: Supplementary file 1 [file 32591316]
